# Supplementary material for: Identification of epigenetic regulators in the estrogen signaling pathway via siRNA screening
Source: Royal Society of Chemistry journal article supplement (doi:10.1039/d1mo00040c), 2021-05-14
Supplement: d1mo00040c1.xlsx [file d1mo00040c1.xlsx]

## Sheet: Sheet2
plate1		plate2		plate3		plate4		plate5		plate6		plate7		plate8		plate9		plate10		plate11		plate12		plate13		plate14		plate15		plate16
NC	2465.79	NC	2065.12	NC	1887.22	NC	1405.08	NC	1208.15	NC	1044.36	NC	2421.58	NC	1676.1	NC	2122.11	NC	2051.16	NC	1867	NC	1112.98	NC	2303.78	NC	1140.79	NC	3178.12	NC	2130.78
	2201.66		1544.87		1308.08		1406.76		1100.53		849.34		2250.29		2213.97		2541.41		2378.68		2284.34		1085.23		1862.99		1342.87		3062.77		2310.48
	1892.81		1713.2		1344.96		1258.27		1423.29		1373.62		2691.27		1863.63		2526.11		2216.43		1905.48		901.69		2147.95		1356.29		2874.36		2457.94
	2186.75	ave	1774.4	AVE	1513.42	ave	1356.7	AVE	1243.99		1089.11	AVE	2454.38	ave	1917.9	ave	2396.54	AVE	2215.42	AVE	2094.91	ave	1033.3	AVE	2104.91	ave	1279.98		3038.42	ave	2299.73
RAD54B	948.376	KDM1A	3427.45	CBX3	1250.49	PCGF3	1086.53	ATAD2	435.81	ELP3	3122.23	ZBTB4	1177.52	BTAF1	573.922	CBX4	2510.33	HMGA2	724.28	SUV39H1	1232.85	HMGA1	309.214	ACTL6A	1130.72	PHC2	1724.96	PHC3	8837.25	TRIM28	1461.88
	213.875		1436.64		1734.24		1061.48		1469.22		7248.58		476.185		505.351		5396.65		1120.52		722.055		186.488		1254.54		681.229		15405.2		347.697
	6350.04		2696.78		2826.3		1480.48		434.643		2648.74		836.407		1349.23		3646.4		1423.12		2803.48		875.046		15965.8		1641.94		12244.7		603.144
ZMYND8	1637.06	RAD54L2	874.002	SIRT2	1823.38	SMC4	1670.62	DNMT3L	707.486	PBRM1	1522.96	MBD3L1	863.488	CDY1	1074.44	NCOA1	1513.31	NCOA3	240.383	CIITA	1047.49	PRMT1	413.7	ATRX	2720.28	EP300	1332.3	SETD7	2393.86	TRIM33	8065.39
	1005.94		1256.8		2835.45		1389.84		1425.92		1240.9		781.291		991.184		2070.98		605.384		1434.41		299.066		668.902		516.998		6210.67		6003
	753.509		1508.33		968.418		889.616		560.538		2209.04		489.653		1231.05		6200.42		682.079		1057.28		760.075		809.381		3210.16		3747.24		8210.01
KAT6B	852.86	SMC5	2283.88	SRCAP	2281.92	CHAF1A	112703	ACTL6B	611.216	FBXW7	477.131	MBD6	1220.14	SMC3	2010.88	EED	2407.14	RNF2	1557.78	BPTF	5149.62	MBD1	1127.67	BMI1	1718.6	ERCC6	1246.04	PCGF6	1493.36	DOT1L	2493.87
	1235.05		2425.35		1727.7		28659.7		569.957		580.276		2391.23		978.236		12548		3906.45		1362.55		804.541		6033.98		2745.27		1391.33		1367.47
	1295		1622.24		3913.34		84778.8		1133.84		1534.81		1626.59		956.508		2777.52		2799.02		1873.68		1375.22		5976.31		1354.78		2188.37		1653.74
SUZ12	4514.75	SIRT1	1391.52	CBX1	3265.56	ZBTB33	215.765	RSF1	999.082	ASF1B	1855.53	CDYL2	2008.28	MTA2	1022.79	MBD4	2585.4	RING1	1999.71	KAT2A	2036.08	MECP2	391.434	ATF2	4225.55	EZH1	836.457	PCGF5	731.879	KDM2B	1015.11
	10548.6		1665.64		2399.75		3432.37		2294.2		602.778		1239.22		1324.94		2736.49		3255.62		2223.45		662.89		2076.67		455.106		1672.21		2316
	3549.97		1416.15		4555.6		2140.63		1194.25		1076.92		1471.19		464.756		2542		1666.42		988.196		618.498		3811.91		1866.04		1144.4		1036.44
CBX7	1607.73	CBX6	900.562	ZMYND11	537.054	PJA2	367.954	MBD3	673.105	MBD5	1141.35	MBD3L2	1820	MBD2	756.095	HIRA	3216.56	KMT2A	2528.48	HMGB1	984.159	HDAC10	1119.15	CREBBP	2678.11	EZH2	1230.74	BRD2	1895.25	PCGF1	1875.3
	2040.07		1102.31		484.074		722.3		1095.55		685.956		4257.51		734.677		3100.92		2225.28		440.414		614.046		1714.22		2391.55		2941.39		1119.53
	975.862		603.293		1729.88		2885.69		1545.97		1871.12		1014.5		2384.02		4460.6		3827.52		1047.57		935.268		1922.21		2147.43		11980		1055.28
PADI4	2086.34	SMC1B	11838.8	SMC2	610.097	CHD1L	1486.48	BRWD1	1192.32	ASH1L	1985.03	HMGB4	2177.3	CHAF1B	1590.17	PCGF2	1914.49	NAP1L4	4072.88	HMGB2	992.074	KAT8	497.961	DNMT1	4746.45	SMYD3	1037.97	BRD3	1605.61
	1795.96		1245.74		1362.89		875.544		526.279		1376.21		1982.18		8261.38		1970.15		2359.1		789.467		593.297		1471.79		547.048		1350.15
	1315.75		3572.68		1062.09		1203.98		797.119		1231.55		999.616		47936.8		2536.92		2935.4		1062.45		823.712		8854.43		1487.37		1732.82
CBX5	2612.57	ASF1A	1064.52	KAT5	1016.39	GTF3C4	3264.58	POLE3	520.66	SMARCAD1	1227.58	CDY1B	1482.51	SMC1A	1017.04	BRPF1	1522.45	RAD21	6035.47	HMGB3	2051.89	CHD6	646.732	DNMT3A	3374.88	SMC6	1593.24	BRD4	1044.63
	2203.49		1818.25		647.898		973.309		261.584		967.435		1986.09		785.403		1352.91		1334.71		631.542		659.169		1889.14		2273.12		3856.37
	2514.9		920.735		2619.53		528.261		839.616		4404.69		1019.22		1188.52		3932.6		2661.25		396.928		1291.52		844.582		1126.62		1254.06
SCMH1	1237.72	CECR2	1272.1	HMGN4	863.151	CDY2A	537.777	INO80	2207.06	CBX8	3621.27	ZBTB38	578.785	RAD54L	643.164	KAT6A	2085.54	RBBP4	1195.14	HMGN1	1138.7	DICER1	892.801	DNMT3B	1569.58	SUV39H2	592.312	TAF1	3925.83
	2013.56		1506.13		1078.91		723.132		1206.81		2276.01		4833.72		787.574		1102.2		3453.02		1040.8		476.106		762.55		4841.48		8262.43
	2096.09		2138.12		1042.49		1448.22		923.669		3718.1		1839.51		767.124		641.92		3839.32		499.072		312.901		1450.13		1155.34		12397.6
KDM2A	2200.92	KAT7	940.489	PRMT5	677.274	HMGN3	440.517	ERCC6L	1412.57	EP400	1340.95	ERCC6L2	1676.35	TTF2	1077.41	KMT2D	2589.03	SSRP1	3312.88	HMGN2	1570.55	RBBP7	4185.3	PHC1	2929.66	EHMT1	854.674	TRIM24	3385.74
	1217.26		425.803		367.508		379.664		798.789		3364.22		964.648		732.004		1068.2		4936.28		1435.53		1760.07		677.168		550.455		3746.04
	1178.51		869.427		502.802		716.039		829.779		2966.73		1296.56		893.922		1137.3		1508.98		688.348		3916.51		1100.42		603.562		4038.12
BLANK	48.3883
