# Supplementary material for: Identification of epigenetic regulators in the estrogen signaling pathway via siRNA screening
Source: Royal Society of Chemistry journal article supplement (doi:10.1039/d1mo00040c), 2021-05-14
Supplement: d1mo00040c2.pdf [file d1mo00040c2.pdf]

## Supporting information

### Identification of Epigenetic Regulators in Estrogen Signaling

#### Pathway via siRNA Screening

Yun Ren<sup>1,2</sup>, Yan Liu<sup>1,2</sup>, and Hailin Wang<sup>1,2,3,\*</sup>

<sup>1</sup>State Key Laboratory of Environmental Chemistry and Ecotoxicology, Research Center for Eco-Environmental Sciences, Chinese Academy of Sciences, Beijing 100085, China

<sup>2</sup>University of Chinese Academy of Sciences, Beijing 100049, China

<sup>3</sup>Institute of Environment and Health, Jiangnan University, Wuhan 430056, China

\* Corresponding Author

Hai-lin Wang, Email: hlwang@rcees.ac.cn

Tel/Fax: +86-10-62849600

#### Table of contents

1. Estrogen signaling regulators selected from siRNA screening (Table S1)
2. The topological parameters of genes in the PPI network (Table S2)
3. Expression of PcG genes according to breast cancer stages (Figure S1)
4. Kaplan-Meier analysis of relapse-free survival in breast cancer stratified by 10 PcG genes expression level (Figure S2)

**Table S1. Estrogen signaling regulators selected from the siRNA screening**

| Gene symbols | Description                                              | Fold change relative to siControl |      |      |
|--------------|----------------------------------------------------------|-----------------------------------|------|------|
| ZMYND8       | zinc finger MYND-type containing 8                       | 0.34                              | 0.46 | 0.75 |
| KAT6B        | lysine acetyltransferase 6B                              | 0.39                              | 0.56 | 0.60 |
| CBX6         | chromobox 6                                              | 0.34                              | 0.51 | 0.62 |
| KAT7         | lysine acetyltransferase                                 | 0.24                              | 0.49 | 0.53 |
| ZMYND1<br>1  | zinc finger MYND-type containing 11                      | 0.32                              | 0.35 | 1.14 |
| CDY2A        | chromodomain Y-linked 2A                                 | 0.40                              | 0.53 | 1.07 |
| HMGN3        | high mobility group nucleosomal binding domain 3         | 0.28                              | 0.32 | 0.53 |
| ATAD2        | ATPase family AAA domain containing 2                    | 0.35                              | 0.35 | 1.18 |
| DNMT3L       | DNA methyltransferase 3 like                             | 0.45                              | 0.57 | 1.15 |
| SMC3         | structural maintenance of chromosomes 3                  | 0.50                              | 0.51 | 1.05 |
| ZBTB4        | zinc finger and BTB domain containing 4                  | 0.19                              | 0.34 | 0.48 |
| KAT6A        | lysine acetyltransferase 6A                              | 0.27                              | 0.46 | 0.87 |
| KMT2D        | lysine methyltransferase 2D                              | 0.45                              | 0.47 | 1.08 |
| HMGA2        | high mobility group AT-hook 2                            | 0.33                              | 0.51 | 0.64 |
| NCOA3        | nuclear receptor coactivator 3                           | 0.11                              | 0.27 | 0.31 |
| SUV39H1      | suppressor of variegation 3-9 homolog 1                  | 0.34                              | 0.59 | 1.34 |
| CIITA        | class II major histocompatibility complex transactivator | 0.50                              | 0.50 | 0.68 |
| HMGB1        | high mobility group box 1                                | 0.21                              | 0.47 | 0.50 |
| HMGB2        | high mobility group box 2                                | 0.38                              | 0.47 | 0.51 |
| HMGB3        | high mobility group box 3                                | 0.19                              | 0.30 | 0.98 |
| HMGN1        | high mobility group nucleosome binding domain 1          | 0.33                              | 0.69 | 0.75 |
| HMGA1        | high mobility group AT-hook 1                            | 0.18                              | 0.30 | 0.85 |

|        |                                                |      |      |      |
|--------|------------------------------------------------|------|------|------|
| MECP2  | methyl-CpG binding protein 2                   | 0.38 | 0.60 | 0.64 |
| CHD6   | chromodomain helicase DNA binding protein 6    | 0.47 | 0.64 | 1.25 |
| EHMT1  | euchromatic histone lysine methyltransferase 1 | 0.43 | 0.47 | 0.67 |
| PCGF6  | polycomb group ring finger 6                   | 0.46 | 0.49 | 0.72 |
| PCGF5  | polycomb group ring finger 5                   | 0.24 | 0.38 | 0.55 |
| BRD3   | bromodomain containing 3                       | 0.44 | 0.53 | 0.57 |
| BRD4   | bromodomain containing 4                       | 0.34 | 0.41 | 1.27 |
| TRIM28 | tripartite motif containing 28                 | 0.15 | 0.26 | 0.64 |
| KDM2B  | lysine demethylase 2B                          | 0.44 | 0.45 | 1.01 |
| PCGF1  | polycomb group ring finger 1                   | 0.46 | 0.49 | 0.82 |
| SMC1B  | structural maintenance of chromosomes 1B       | 6.67 | 2.02 | 0.70 |
| SUZ12  | polycomb repressive complex 2 subunit          | 4.82 | 2.06 | 1.62 |
| CBX1   | chromobox 1                                    | 3.01 | 2.16 | 1.59 |
| CHAF1A | chromatin assembly factor 1 subunit A          | 83.1 | 62.5 | 21.1 |
| ELP3   | elongator acetyltransferase complex subunit 3  | 6.66 | 2.87 | 2.43 |
| CBX8   | chromobox 8                                    | 3.41 | 3.33 | 2.09 |
| EP400  | E1A binding protein p400                       | 3.09 | 2.72 | 1.23 |
| CHAF1B | chromatin assembly factor 1 subunit B          | 25.0 | 4.31 | 0.83 |
| RBBP7  | RB binding protein 7                           | 4.05 | 3.79 | 1.70 |
| BMI1   | BMI1 proto-oncogene, polycomb ring finger      | 2.87 | 2.84 | 0.82 |
| ATF2   | activating transcription factor 2              | 2.01 | 1.81 | 0.99 |
| DNMT1  | DNA methyltransferase 1                        | 4.21 | 2.25 | 0.70 |
| PHC3   | polyhomeotic homolog 3                         | 5.07 | 4.03 | 2.91 |
| TAF1   | TATA-box binding protein associated factor 1   | 4.08 | 2.72 | 1.29 |

|        |                                |      |      |      |
|--------|--------------------------------|------|------|------|
| TRIM33 | tripartite motif containing 33 | 3.57 | 3.51 | 2.61 |
|--------|--------------------------------|------|------|------|

**Table S2. The topological parameters of genes in the PPI network**

| Gene symbol | MCC   | Degree | Gene symbol | MCC | Degree |
|-------------|-------|--------|-------------|-----|--------|
| SUZ12       | 45976 | 18     | NCOA3       | 16  | 9      |
| PCGF6       | 45648 | 11     | KAT6B       | 14  | 5      |
| BMI1        | 45625 | 12     | CHAF1A      | 12  | 4      |
| PCGF1       | 45600 | 10     | EP400       | 11  | 8      |
| CBX6        | 45480 | 10     | CHAF1B      | 11  | 6      |
| CBX8        | 45480 | 10     | ATAD2       | 9   | 5      |
| PCGF5       | 45360 | 9      | ELP3        | 8   | 4      |
| RBBP7       | 40922 | 20     | BRD3        | 8   | 4      |
| PHC3        | 40440 | 9      | HMGB1       | 7   | 5      |
| KDM2B       | 5210  | 11     | HMGA1       | 6   | 5      |
| CBX1        | 618   | 17     | SMC3        | 5   | 5      |
| EHMT1       | 390   | 11     | HMGA2       | 4   | 4      |
| SUV39H1     | 372   | 11     | HMGB2       | 4   | 3      |
| DNMT1       | 372   | 11     | SMC1B       | 4   | 3      |
| MECP2       | 146   | 8      | HMGB3       | 3   | 3      |
| ATF2        | 122   | 7      | HMGN1       | 3   | 3      |
| KAT6A       | 64    | 12     | KAT7        | 3   | 3      |
| DNMT3L      | 54    | 6      | CHD6        | 2   | 2      |
| TRIM28      | 38    | 7      | ZMYND11     | 2   | 2      |
| TAF1        | 28    | 9      | TRIM33      | 2   | 2      |
| BRD4        | 28    | 9      | ZBTB4       | 1   | 1      |
| KMT2D       | 20    | 8      |             |     |        |

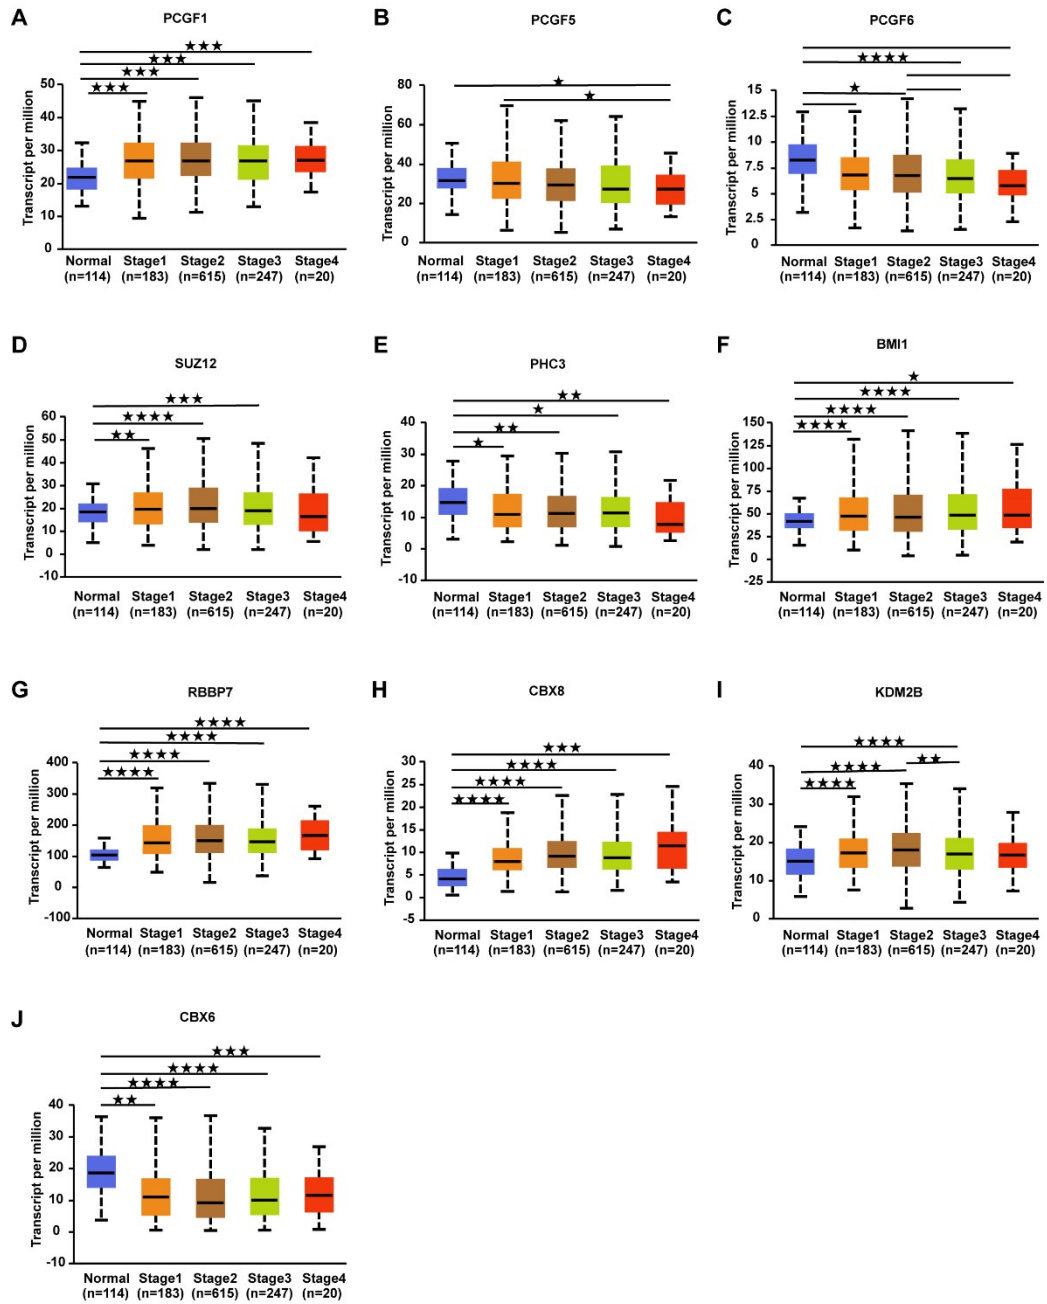

**Figure S1.** Expression of PcG genes according to breast cancer stages. (A)PCGF1, (B)PCGF5, (C)PCGF6, (D)SUZ12, (E)PHC3, (F)BMI1, (G)RBBP7, (H)CBX8, (I)KDM2B, (J)CBX6.

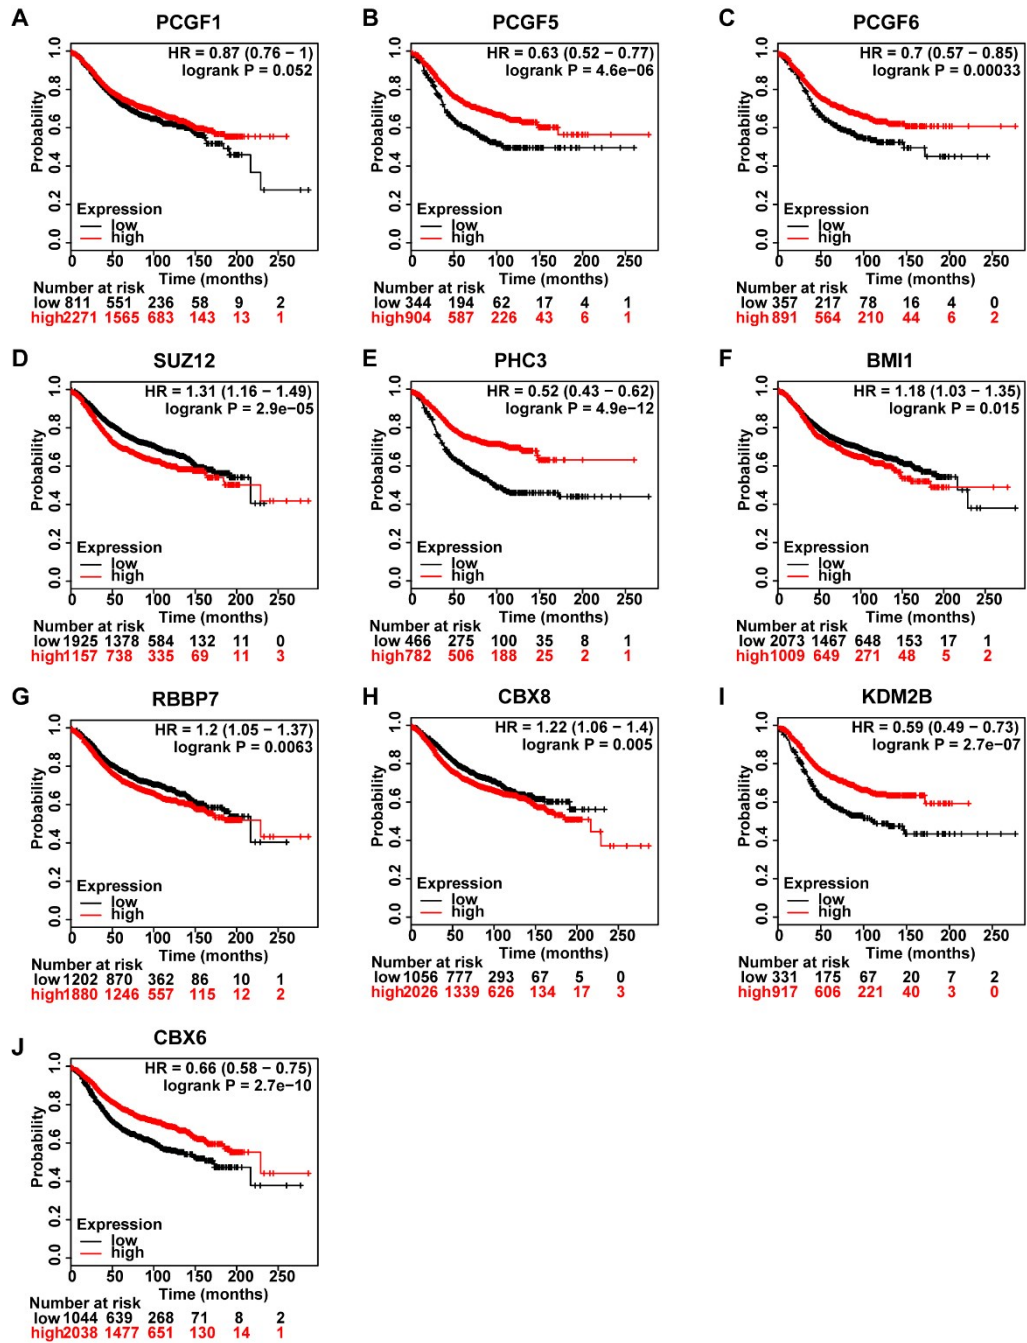

**Figure S2.** Kaplan-Meier analysis of relapse-free survival in breast cancer stratified by gene expression level. (A) PCGF1, (B) PCGF5, (C) PCGF6, (D) SUZ12, (E) PHC3, (F) BMI1, (G) RBBP7, (H) CBX8, (I) KDM2B, (J) CBX6.
